1 **Health Workers' Perspectives on School-Based Mass Drug Administration Control**  
2 **Programs for Soil-Transmitted Helminths and Schistosomiasis in Ogun State, Nigeria.**  
3  
4 **Folahanmi T. Akinsolu<sup>1,2\*</sup>, Olunike R. Abodunrin<sup>1,3¶</sup>, Mobolaji T. Olagunju<sup>4¶</sup>, Ifeoluwa E.**  
5 **Adewole<sup>1&</sup>, Oluwabukola M. Ola<sup>1&</sup>, Chukwuemeka Abel<sup>1&</sup>, Rukayat Sanni-Adeniyi<sup>1&</sup>,**  
6 **Nurudeen O. Rahman<sup>7¶</sup>, Olukunmi O. Akanni<sup>1&</sup>, Diana W. Njuguna<sup>5¶</sup>, Islamiat Y.**  
7 **Soneye<sup>6&</sup>, Abideen O. Salako<sup>1,2\*</sup>, Oliver C. Ezechi<sup>1,2\*</sup>, Orsolya E. Varga<sup>8¶</sup>, Olaoluwa P.**  
8 **Akinwale<sup>1,2¶</sup>**

9  
10 **<sup>1</sup>Lead City University, Ibadan**

11 **<sup>2</sup>Nigerian Institute of Medical Research, Lagos**

12 **<sup>3</sup>Lagos State Health Management Agency, Lagos**

13 **<sup>4</sup>Nanjing Medical University, China**

14 **<sup>5</sup>Dedan Kimathi University of Technology, Kenya**

15 **<sup>6</sup>Ogun State Ministry of Health, Abeokuta**

16 **<sup>7</sup>Swiss Tropical and Public Health Institute, Switzerland**

17 **<sup>8</sup>University of Debrecen, Hungary**

18

19 **\*[Folahanmi.tomiwa@gmail.com](mailto:Folahanmi.tomiwa@gmail.com)**

20

21 **¶These authors contributed equally to this work.**

22 **&These authors also contributed equally to this work.**

23 **Abstract**

24 **Background:** Soil-transmitted helminths (STH) and schistosomiasis are widespread neglected  
25 tropical diseases (NTDs), impacting 1.5 billion individuals, primarily in resource-limited settings.  
26 With the highest schistosomiasis prevalence in sub-Saharan Africa, Nigeria treats 20 million  
27 annually. Mass Drug Administration (MDA) programs target vulnerable groups like school-age  
28 children to tackle these diseases. This study explores health worker perspectives on MDA  
29 implementation in Ogun's selected LGAs, pinpointing challenges and enablers. Health workers'  
30 insights enhance program effectiveness, aligning with NTD 2030 goals.

31 **Methodology/Principal Findings:** The study used a qualitative research approach involving  
32 focus group discussions and in-depth interviews with health workers engaged in neglected tropical  
33 disease control programs in Ogun State, Nigeria. A semi-structured questionnaire guided the  
34 exploration of ideas, and the data were analyzed using the QRS Nvivo 12 software package. The  
35 study found that the school-based MDA control program's efficacy largely relies on strong  
36 collaborations and partnerships, particularly with educators, community heads, and other  
37 stakeholders. These alliances and strategic communication methods, like town announcements and  
38 media campaigns, have been pivotal in reaching communities. However, the program does grapple  
39 with hurdles such as parental misconceptions, limited funds, insufficient staffing, and  
40 misalignment with the Ministry of Education. It is recommended to boost funding, foster early  
41 stakeholder involvement, enhance mobilization techniques, and consider introducing a monitoring  
42 card system similar to immunization.

43 **Conclusions/Significance:** The MDA Integrated Control Programs for STH and SCH in Ogun  
44 State schools demonstrate a holistic approach, integrating knowledge, collaboration,  
45 communication, and feedback. Health workers have shown commitment and adeptness in their

46 roles. However, achieving maximum efficacy requires addressing critical barriers, such as parental  
47 misconceptions and funding challenges. Adopting the recommended strategies, including  
48 proactive communication, increased remuneration, and introducing a tracking system, can  
49 significantly enhance the program's reach and impact. The involvement of all stakeholders, from  
50 health workers to community leaders and parents, is essential for the program's sustainability and  
51 success.

52

53 **Keywords:** Soil-transmitted helminths; Schistosomiasis; Mass Drug Administration; Health  
54 worker perspectives

55

56 **Author Summary**

57 This study explored what health workers think about the programs in place to help control and  
58 prevent certain tropical diseases that are pretty common and affect many people, mainly in areas  
59 with limited resources. In Ogun State, Nigeria, these programs often involve giving out medicine  
60 to groups who are at high risk, including school children. The health workers shared that working  
61 with teacher’s community leaders, and using various ways to communicate with people have  
62 helped reach out to communities. However, they also noted some challenges, such as wrong beliefs  
63 held by parents, insufficient funds, and insufficient people to work on the program. To make the  
64 program better, the health workers suggest having more money allocated to the program, involving  
65 community people early on in the planning, and possibly starting a card system to keep track of  
66 the medication given, just like what is done with immunizations. The study underlines the  
67 importance of everyone working together — from health workers to parents and community  
68 leaders — to ensure the program can continue successfully and help more people.

## 69 **Introduction**

70 Soil-transmitted helminths (STH) and schistosomiasis (SCH) rank among the top neglected  
71 tropical diseases (NTDs) globally, affecting around 1.5 billion people, primarily in areas with  
72 limited resources (1). Approximately 400 million of this global burden originate in Africa (2).  
73 Nigeria has the highest prevalence of NTDs in Sub-Saharan Africa (3, 4). Thus, an alarming 20  
74 million individuals yearly require treatment for schistosomiasis (5). These parasitic infections  
75 disproportionately affect vulnerable populations, especially children, and perpetuate a cycle of  
76 poverty, impaired cognitive development, and reduced school attendance (6-8).

77 The 2030 NTD Roadmap has a strategic focus on controlling and eliminating NTDs, which has a  
78 significant portion of its success in implementing integrated mass drug administration programs  
79 (9). Mass Drug Administration (MDA) control program is a global strategy initiated to interrupt  
80 the cycle of parasitic infections by delivering precise treatments to the most susceptible groups,  
81 particularly school-age children (SAC) (3, 10). This initiative commonly entails the distribution  
82 of specific medications, such as deworming pills or preventive treatments for NTDs like SCH and  
83 STH, to substantial cohorts of children within schools and communities where these infections are  
84 endemic (11)(12). Notable, the MDA program initiative has played a pivotal role in alleviating the  
85 burden of SCH and STH (13, 14). However, certain studies have also indicated that despite the  
86 implementation of multiple rounds of MDA targeting STH and SCH in SAC, there has been no  
87 significant change in the prevalence of this disease (15); thus, the barriers to MDA program might  
88 affect the attainment of the 2030 global NTD goals (11).

89 The effectiveness of MDA programs for STH and SCH is not without challenges; it can be  
90 influenced by many factors, including the engagement and perspectives of frontline health workers  
91 (1). Health workers, as the crucial link between the healthcare system and the community, play a

92 crucial role in successfully implementing MDA programs. Therefore, the health worker's  
93 perceptions will provide insights into the challenges and enablers of the MDA control programs  
94 and significantly improve the programs, thus aiding in achieving the NTD 2030 goals (16, 17).  
95 The objectives of this study were to identify the challenges faced by health workers during MDA  
96 implementation in selected local government areas (LGAs) in Ogun State and explore the enablers  
97 that can contribute to successful MDA program execution.

## 98 **Methods and Materials**

### 99 **Ethical Statement**

100 The study was conducted following the principles outlined in the Declaration of Helsinki, and the  
101 study participants' data were treated with strict confidentiality throughout the study. The study  
102 received ethical approval from the Institutional Review Board of the Nigerian Institute of Medical  
103 Research, Lagos, Nigeria (reference number IRB/21/004, approval date February 16, 2021), and  
104 social approval from the Department of Health Planning, Research, and Statistics, Ogun State  
105 Ministry of Health, Ogun State, Nigeria (reference number HPRS/351/388, approval date June 16,  
106 2021). Verbal informed consent was obtained from all study participants after the objective and  
107 purpose of the study were explained. Informed assent forms were provided to children and minors  
108 and informed parental consent was obtained from their parents or local guardians. For illiterate  
109 participants, impartial witnesses were enlisted to assist with the consenting process. Participants  
110 were included in the study only after signing the informed consent/assent form and receiving a  
111 paper copy.

### 112 **Study settings**

113 Ogun State, Nigeria, was selected as the study location due to its high prevalence of STH (19.2%)  
114 and SCH (32.2%) and the inconsistent support of partner programs for NTD control. Four LGAs  
115 in Ogun State were purposively selected based on recommendations from the Department of  
116 Public Health, Ogun State Ministry of Health. The following LGAs were included in the study:  
117 Ikenne, with a prevalence of 12.6% for STH and 1.46% for SCH; Abeokuta North, with a  
118 prevalence of 22.4% for STH and 15.40% for SCH; Abeokuta South, with a prevalence of 27.5%  
119 for STH and 1.61% for SCH; and Obafemi Owode, with a prevalence of 21.1% for STH and 8.78%  
120 for SCH (18).

## 121 **Study Design and Participants**

122 This study employed a qualitative research approach to explore the challenges and enablers of  
123 school-based Mass Drug Administration Strategies in NTD control programs. The study focused  
124 on stakeholders involved in NTD control programs in Ogun State, Nigeria, where STH and SCH  
125 are endemic. Purposive sampling was used to select participants for key informants' interviews  
126 (KIIs) and focus group discussions (FGDs) based on their engagement in various health system  
127 and community positions and their involvement in managing NTDs. The study conducted in-depth  
128 KIIs with the Director of Public Health (DPH), Ogun State Ministry of Health, Medical Officers  
129 of Health (MoHs), Local NTD officers (LNTDs), and health educators. Additionally, the study  
130 conducted FGDs with the community health extension workers (CHEWs). A semi-structured  
131 questionnaire was used during these sessions to guide the exploration of ideas. Thematic analysis  
132 was used to extract key themes from the data. This methodology enabled a comprehensive  
133 understanding of the challenges faced by NTD control programs in addressing STH and SCH and  
134 provided valuable insights into the barriers to achieving effective control interventions.

## 135 **Sample size determination**

136 As a qualitative study, the authors did not perform sample size calculation; instead, they  
137 predetermined the number of FGDs and KIIs necessary to achieve ideal saturation. The authors  
138 conducted 4 FGDs and 11 KIIs to reach this goal.

## 139 **Data Collection**

140 A total of 4 FGDs (CHEWs) and 11 KIISs (DoPH, MoHs, and LNTDs) were conducted amongst  
141 the health workers involved in the school-based MDA control program. The semi-structured and  
142 FGDs interview topics were developed and pretested to ensure the data's reliability. Audio tape  
143 recorders captured all the information obtained during the KIIs and FGDs. The interviewers also



144 made observations and took notes while recording to ensure accuracy. The interviews were  
145 conducted in both English (the national language of Nigeria) and Yoruba (the local language of  
146 the study participants) in various settings, including small halls, private rooms, and offices. The  
147 duration of each KII ranged from 30 - 40 minutes, and the FGDs took 35 – 45 minutes. FGDs were  
148 conducted in the participants’ respective LGAs.

### 149 **Data Processing and Analysis**

150 Data from FGDs and KIIs were transcribed, coded, and analyzed thematically based on the  
151 emerging themes of knowledge, collaboration and partnership, communication, perceived barriers,  
152 and recommendations. The recorded audio in the Yoruba language was transcribed into the  
153 English language. Transcription was done independently among the team members and then  
154 checked for verification and accuracy with simultaneous audio playing. The study content was  
155 analyzed thematically, indexed, and coded inductively using the QRS NVivo 12 software package  
156 (QRS International, Doncaster, Australia) for the content analysis of unstructured qualitative data.  
157 The initial open codes were sorted into sub-themes based on their similarity. According to the  
158 participant’s responses, these sub-themes were clustered and refined to form broad themes and  
159 debated within the research team. Data collection, analysis, and reporting followed the Standards  
160 for Reporting Qualitative Research (SPQR) guidelines.

161 Guba and Lincoln’s criteria for determining rigor in qualitative research were used to ensure  
162 consistency during protocol preparation, data collection, development of a coding system,  
163 interrater reliability, and data analysis (19). Two interviews per group were coded by two authors  
164 (FT & OR), for which the degree of similarity was determined by calculating the interrater  
165 reliability using the QRS NVivo 12 software. Cohen proposed that Kappa scores should be  
166 interpreted using the following: values  $\leq 0$  indicate lack of agreement, values 0.01–0.20 indicate

167 no or little agreement, values 0.21–0.40 indicate fair agreement, values 0.41–0.60 indicate  
168 moderate agreement, values 0.61– 0.80 indicate substantial agreement, and values 0.81–1.00  
169 indicate nearly perfect agreement. Kappa’s score for the thematic analysis was 1.00, indicating  
170 nearly perfect agreement.

#### 171 **Data quality control**

172 The team members discussed the KIIs and FGDs questions before data collection to ensure the  
173 data quality. The study team organized three-day training for the data collectors on how to conduct  
174 in-depth interviews and FGDs. Supervision was done throughout the data collection process by  
175 the investigators.

176

177 **Results**

178 The study findings were categorized into five thematic areas: Knowledge, Collaboration and  
179 Partnerships, Communication, Perceived Barriers, and Recommendations, as shown in Table 1.  
180 The participants were health workers from the Ogun State Ministry of Health whose socio-  
181 demographic characteristics demonstrated the appropriateness of each category. From the health  
182 workers' perspective, the study participants described key components of MDA-integrated control  
183 programs for STH and SCH.

184 **Table 1: Thematic Areas**

| Themes                         |
|--------------------------------|
| Knowledge                      |
| Collaboration and Partnerships |
| Communication                  |
| Perceived Barriers             |
| Recommendations                |

185

186 **Demographic characteristics of participants**

187 A total of 41 health workers were interviewed. 4 FGDs were conducted amongst the CHEW, while  
188 9 KIIs were conducted among the DoPH, MoHs, and LNTDs. (See Table 2)

189 **Table 2. Composition of Key Informant Interview and Focused Group Discussion.**

| Participants | Female | Male | Total |
|--------------|--------|------|-------|
| CHEW         | 23     | 9    | 32    |
| LNTD         | 4      | -    | 4     |
| MOH          | 2      | 2    | 4     |
| DoPH         | -      | 1    | 1     |

190

191

192 **Theme 1: Knowledge**

193 All the health workers interviewed had adequate knowledge and were involved in the school-based  
194 MDA Integrated Control Programmes for STH and SCH. When asked if the participants were  
195 familiar with the MDA program, an MoH from one of the LGAs said,

196 *“I know well about MDA, and there has been a positive response from the recipients.”*

197 Another LNTD officer who has participated in the MDA program said that,

198 *“Yes, I am very conversant with it because yesterday we did one at a school, and I monitored  
199 them.”*

200 A CHEW who educates and immunizes both children and adults in the community said,

201 *“I am familiar with MDA and recently administered drugs to the communities.”*

202 Another CHEW shared her involvement in the program. She stated;

203 *“I have been involved in the pre-implementation and post-implementation stage. During the pre-  
204 implementation, we identified forms in the school and community. The stakeholders call parents  
205 who don't want their children to take it, and we call religious leaders to meetings and solicit their  
206 assistance in the community. Then, during post-implementation, we want to see how many children  
207 have accessed the drugs, what points we want to clap on ourselves that we have done well, and  
208 what areas of challenges we like to identify to avoid in our next round.”*

209 **Theme 2: Collaboration and Partnerships**

210 The importance of collaboration and partnerships cannot be overemphasized in the success of a  
211 program, which was evident when the health workers were asked if they collaborated or partnered  
212 with other people on the MDA control programs for STH and SCH, a CHEW stated,

213 *“We work with some teachers and train them because the children do not want to accept the drugs.”*

214 Another CHEW who further elaborated on their partnership with the school and how their joint  
215 effort has helped them in the success of the MDA program stated that,

216 *“Some schools invite us to PTA meetings where issues are addressed at the PTA meetings. After*  
217 *the meeting, drug administrations started immediately. The staff and educators collaborate in*  
218 *Abeokuta South.”*

219 Most health workers opined that engaging community leader fosters trust and increases  
220 community compliance rates.

221 An LNTD officer cited a situation that the community leader rescued. He stated that,

222 *“Some of them do resist it, but when we call the community leader, he also helps us to explain to*  
223 *them, and they cooperate with us.”*

224 Another LNTD officer stated that,

225 *“Community leaders help us disseminate the information, and we, as LNTD officers, go to them*  
226 *again when we want to distribute letters we go again to tell them.”*

### 227 **Theme 3: Communication**

228 Health workers acknowledged the different communication strategies that create a communication  
229 synergy that contributes to the effectiveness of the MDA Integrated Control Programmes for STH  
230 and SCH.

231 One of the MoHs stated that,

232 *“There’s good communication between Local Government and the community. There’s a process*  
233 *to which it will be done; we go through common head leaders, and through Town announcers, he*  
234 *will announce it to convince them of acceptability.”*

235 An LNTD officer also stated that,

236 *“We communicate the school-based program through communication mobilization and*  
237 *sensitization (radio jingles, flyers, posters, and outdoor van campaign), which is very effective.”*

238 A CHEW refers to a situation that occurred a few years ago, stating that,

239 *“A female student slept after taking the drugs till closing time, and the next day, we were told she*  
240 *was dead.”*

241 Another CHEW stated that,

242 *“The parents still find a way to say don’t give my child.”*

243 The situation proffers the need to communicate with parents. Hence, she stated,

244 *“We have the parents' numbers to get their consent for their child to be given or not; this is because*  
245 *of some of the issues encountered before.”*

246 Conversely, the synergy in the communication is not only with the community but also with  
247 stakeholders, sponsors, and the State Government.

248 A CHEW stated that,

249 *“Our communication with sponsors is okay; there are various WhatsApp groups where we*  
250 *interact.”*

251 Also, one of the MoHs noted the education sector's role in the program,

252 *“Both public and private schools ensure all eligible students are being covered, and this process*  
253 *has been very effective.”*

#### 254 **Theme 4: Perceived Barriers**

255 The study evaluated perceived barriers among health workers regarding School-Based MDA  
256 Integrated Control Programmes for STH and SCH.

257 The CHEW pointed out that,

258 *“Parents are the challenge. Some are adamant. So many false beliefs (it kills, it's for sterilization.)”*

259 Another CHEW confirmed the point mentioned above. She stated that,

260 *“Well! According to my job, I can say Ignorance is the problem. Some people rely on what*  
261 *happened in the past, and the influence of people on each other affects the program.”*

262 An LTND officer opined that,

263 *“False information like a taboo; two children died! If we can eradicate such, the program will go*  
264 *smoothly.”*

265 Additionally, health workers noted that their small remuneration and inadequate staffing affect  
266 their efficiency,

267 A CHEW opined that,

268 *“Health workers alone cannot do the work alone because we are understaffed workers are not*  
269 *being paid and not enough mobilizers to work.”*

270 *“Two Community Distributors cannot cover a whole community. They take drugs to their houses,*  
271 *which is stressful to operate.”*

272 While another CHEW stated that,

273 *“The stipend attached to mobilization is two thousand Nigerian naira (\$2.65), which is small. In*  
274 *this present-day Nigeria, it is not good.”*

275 An LNTD officer opined that,

276 *“Funding is a shortcoming for this program, so we couldn’t go to each school and class to inform*  
277 *the children, and also we can’t reach the out-of-school children.”*

278 A MoH also shared what he perceived as the barrier.

279 *“All we need more is being able to mobilize people and sensitization; that is what is not optimal.”*

280 Another MoH noted the shortcomings of the Ministry of Education.

281 *“Poor participation of the Ministry of Education. The school is not as coordinated as expected*  
282 *because the schools often don’t know about the program. They will say they have not been told*  
283 *that some people are coming, so they are trying to know if the school is registered or not.”*

284 **Theme 5: Recommendation**

285 The health workers shared different suggestions to improve the School-Based MDA Integrated  
286 Control Programmes for STH and SCH.

287 Most of the CHEW suggested more mobilization and increasing their remuneration.

288 *“More hands to be on deck if there’s a way we can involve people in the community to ensure*  
289 *more coverage and mobilizers.”*

290 *“The issue of funding, if possible, they should increase the funding. Ensure more community*  
291 *participation through the mobilizers.”*

292 *“Government should increase their fund to increase their work rate, and also Government should*  
293 *provide a means mobilizing.”*

294 Similarly, one LNTD officer opined that,

295 *“If they can fund the program very well, I think it will encourage those people doing it, then the*  
296 *mobilization program also; jingles and posters.”*

297 A MoH shared the same thought,

298 *“Funding is key; increase funding so that more schools and teachers are involved. Like this last*  
299 *one, we have a school where only a teacher was involved, the same teacher will write, it can’t*  
300 *work if there is no fund let’s not do it at all because in the school at least we need to train more*  
301 *than one let’s have at least three or four you understand then have more schools, involve the*  
302 *private schools, there are kids there too. By then, more people will be captured, and it will give us*  
303 *data of how many people and all that.’*



304 A CHEW also recommended incentives for partners,

305 *“Partners that help work within the community should be given a token. They should be given*  
306 *identification tags and materials or aprons. The drugs can be printed on the aprons. It can be*  
307 *retrieved, wasted, and reused. Posters tear easily from pain and sweat.”*

308 A MoH also noted the importance of proper planning and the involvement of stakeholders.

309 *“All parties involved will make the program sustainable. “*

310 *“Involve parents, especially mothers, in the infant welfare clinic,”*

311 Another MoH stated that,

312 *“Preparation ahead of time will stop the crash of the program.”*

313 In addition, he opined that,

314 *“People should be involved at the planning stage.”*

315 Some health workers recommended a more proactive approach that can be considered. An LNTD  
316 officer stated that,

317 *“NTD messages can be brought in health education, just like vaccination, family planning, etc.”*

318 A MoH opined that,

319 *“If it can be like immunization, which is done when there is a card, you understand, that makes it*  
320 *smooth so the child knows when to get it so the facility they have it rather than wait for the*  
321 *programs. Let everybody know that they have a card to follow because many times you get to the*  
322 *school, the kids may not even remember. For example, we had last year but could not see if it was*  
323 *October, November, or December. So likewise for the kids, when last did you take, you say, last*  
324 *year? But if there was a card, everybody could follow up; I know when I am due. The program*  
325 *should just run like we have routine immunization. That is the policy I feel will be nice for those*  
326 *kids 5-14.”*

327

328

329 **Discussion**

330 Evaluating the understanding of health workers engaged in school-based MDA control programs  
331 regarding the challenges and facilitators of the program is crucial for its success (20) to ensure that  
332 comprehensive knowledge and necessary actions are aligned to achieve program objectives across  
333 all levels. According to Piotrowski et al. and Kabatereine et al., it's essential to consider insights  
334 from experienced health workers, the frontline individuals who directly interact with the target  
335 population in the program's initial stages (21, 22). Our study showed that health workers possess  
336 adequate knowledge of the program, demonstrating experience in their roles. Furthermore, it was  
337 evident that their engagement provided them with valuable opportunities for active community-  
338 based participation.

339 Collaboration is integral to the success of the MDA program (23). Project managers need to partner  
340 with stakeholders who can enhance the program's effectiveness. In this study, the collaborative  
341 efforts showcased by health workers, schools, and community leaders underscore the significance  
342 of partnerships in achieving success in MDA programs targeting STH and SCH. As highlighted  
343 by one CHEW, the involvement of teachers in the MDA program demonstrates a strategic  
344 approach to overcoming reluctance among children. This collaboration improves the acceptance  
345 of drugs and ensures that children receive essential treatment for these NTDs. Such partnerships  
346 between health workers and educators showcase the potential for leveraging existing networks  
347 within communities to achieve program goals. Partnerships also enhance community engagement,  
348 build trust, address resistance, and streamline program implementation (24). Acknowledging and  
349 nurturing such collaborations will be crucial to reducing the burden of these NTDs and improving  
350 the health and well-being of affected communities. These findings agreed with the study  
351 conducted in Cambodia on collaboration and engagement in the MDA control programs (23).

352 Effective communication among stakeholders and involved parties is critical to an MDA control  
353 program's success (11). Haiti's NTD control program had achieved a national scale, driven by  
354 strong communication and good epidemiological coverage in MDA. This success is owed to  
355 crucial elements, including resource communication, logistical coordination, and a community  
356 awareness campaign (25). Our study highlighted how healthcare workers recognize the synergistic  
357 enhancement of MDA control programs for STH and SCH through diverse communication  
358 strategies. Health workers acknowledged effective communication with community leaders and  
359 stakeholders, facilitating program acceptance and local support for field officers, and this aligns  
360 with findings in other programs (26).

361 The study's findings shed light on perceived barriers among health workers in implementing  
362 School-Based MDA control programs for STH and SCH. These barriers were identified by health  
363 workers closely engaged with local communities. They highlighted that parents' resistance to the  
364 program poses a significant challenge. This resistance often stems from false beliefs, including  
365 the misconception that the treatment is lethal or is aimed at sterilization. Our findings highlighted  
366 similar STH and SCH misperceptions from studies in Nigeria and the Philippines (1, 16, 27).  
367 These misconceptions can impede parents' willingness to allow their children to participate and  
368 undermine the success of health programs. However, it underscores the importance of effective  
369 community engagement and communication strategies. Addressing these misconceptions through  
370 targeted awareness campaigns and involving influential community members can foster a better  
371 understanding of the program's intentions and benefits.

372 Another barrier to the program effectiveness the study identified was insufficient staffing and low  
373 remuneration. Health workers stressed that their workload is exacerbated by inadequate numbers,  
374 hindering their ability to reach their target population effectively. Moreover, the limited

375 remuneration to mobilizers undermines their motivation and capacity to engage in the program  
376 entirely. Hence, a common barrier highlighted was the inadequate funding allocated to the  
377 program. This shortage of resources limits the program's scope, preventing comprehensive  
378 coverage and outreach efforts, as stated in similar studies (16, 28-30).

379 This study focused on health workers' perspectives regarding the challenges and facilitators of  
380 school-based MDA control programs for SCH and SCH in Ogun State, Nigeria. The study  
381 highlighted the understanding and active community engagement of health workers' insights as  
382 crucial for program success. Collaboration emerges as essential, showcased by health workers,  
383 educators, and community leaders working together to overcome challenges. Effective  
384 communication is critical in enhancing MDA control program integration and community support.  
385 The study identified barriers such as parental misconceptions and resource limitations, suggesting  
386 awareness campaigns and improved incentives as solutions.

387 We recommended a comprehensive approach to enhance school-based MDA control programs  
388 and strategies for controlling STH and SCH, which involves tailored community engagement  
389 involving local leaders to dispel misconceptions and ensure accurate information dissemination.  
390 Collaboration among health workers, educators, and community leaders is crucial for program  
391 acceptance, supported by effective communication strategies. Addressing workforce challenges,  
392 advocating for funding diversity, proper planning, and prioritizing capacity-building are essential  
393 for achieving lasting success.

394 The study conducted in Ogun State, Nigeria, provides valuable insights into the challenges and  
395 enablers of school-based MDA control programs for addressing NTDs. However, several  
396 limitations exist: the findings are geographically specific and may not generalize to other regions;  
397 translation from Yoruba to English might introduce biases; there's potential for self-reporting bias

398 from participants; purposive sampling could limit diverse perspectives; the sample size was  
399 determined by saturation, possibly missing some viewpoints; thematic analysis is inherently  
400 subjective; reliance on audio recordings might miss non-verbal cues; data collector training does  
401 not guarantee consistent data quality; dominant voices in FGDs could overshadow others; and  
402 cultural norms of the region might influence responses in a way not applicable elsewhere.  
403

404 **Conclusion**

405 The insights of health workers engaged in school-based MDA control programs for STH and SCH  
406 are paramount for optimizing its success. The health workers' first-hand experience provides  
407 invaluable feedback regarding the challenges faced and the solutions that have proven effective.  
408 The study underscores the profound significance of collaboration, not just among health workers  
409 but between them, educators, and community leaders. Such partnerships enhance community  
410 acceptance and facilitate the efficient implementation of the MDA control programs. Effective  
411 communication is a foundational element for addressing misconceptions and garnering  
412 community support. While barriers like parental misconceptions, resource constraints, insufficient  
413 staffing, and inadequate remuneration pose challenges, they can be mitigated through tailored  
414 community engagement, awareness campaigns, and proper incentivization.

415 A multifaceted approach is crucial for MDA control programs targeting STH and SCH to reach  
416 their full potential. This approach should encompass comprehensive community engagement,  
417 robust partnerships among key stakeholders, strategic communication initiatives, and addressing  
418 logistical and resource-related constraints.

419

420 **Acknowledgment**

421 This work received financial support from the United States Agency for International  
422 Development (USAID) through its Neglected Tropical Diseases Program of through their support  
423 of the Coalition for Operational Research on Neglected Tropical Diseases (COR-NTD) grant to  
424 FTA. COR-NTD is funded at The Task Force primarily by the Bill & Melinda Gates Foundation  
425 and USAID. The funders had no role in study design, data collection and analysis, decision to  
426 publish, or preparation of the manuscript.

427



## 428 **References**

- 429 1. Akinsolu FT, Abodunrin OR, Olagunju MT, Adewole IE, Rahman NO, Dabar AM, et al.  
430 Community perception of school-based mass drug administration program for soil-transmitted  
431 helminths and Schistosomiasis in Ogun State, Nigeria. *J PLOS Neglected Tropical Diseases*.  
432 2023;17(7):e0011213.
- 433 2. World Health Organisation. Promising progress on neglected tropical diseases in Africa  
434 World Health Organization. 2022.
- 435 3. Adekeye O, Ozano K, Dixon R, Elhassan EO, Lar L, Schmidt E, et al. Mass administration  
436 of medicines in changing contexts: Acceptability, adaptability and community directed  
437 approaches in Kaduna and Ogun States, Nigeria. *J PLoS neglected tropical diseases*.  
438 2020;14(11):e0008857.
- 439 4. George NS, David SC, Nabiryo M, Sunday BA, Olanrewaju OF, Yangaza Y, et al.  
440 Addressing neglected tropical diseases in Africa: a health equity perspective. *J Global Health*  
441 *Research*. 2023;8(1):1-7.
- 442 5. Oyeyemi OT, de Jesus Jeremias W, Grenfell RFQ. Schistosomiasis in Nigeria: Gleaning  
443 from the past to improve current efforts towards control. *J One Health*. 2020;11:100183.
- 444 6. Echazú A, Bonanno D, Juarez M, Cajal SP, Heredia V, Caropresi S, et al. Effect of poor  
445 access to water and sanitation as risk factors for soil-transmitted helminth infection: selectiveness  
446 by the infective route. *J PLoS Neglected Tropical Diseases*. 2015;9(9):e0004111.
- 447 7. Mazibuko XI, Chimbari M. The effect of schistosomiasis and soil-transmitted helminths  
448 on expressive language skills among African preschool children. *J BMC Infectious Diseases*.  
449 2022;22(1):1-9.

- 450 8. Pabalan N, Singian E, Tabangay L, Jarjanazi H, Boivin MJ, Ezeamama AE. Soil-  
451 transmitted helminth infection, loss of education and cognitive impairment in school-aged children:  
452 A systematic review and meta-analysis. *J PLoS neglected tropical diseases*. 2018;12(1):e0005523.
- 453 9. Casulli A. New global targets for NTDs in the WHO roadmap 2021–2030. *J PLoS*  
454 *neglected tropical diseases: Public Library of Science San Francisco, CA USA; 2021. p. e0009373.*
- 455 10. Chanhanga N, Mindu T, Mogaka J, Chimbari M. The Impact of Targeted Treatment and  
456 Mass Drug Administration Delivery Strategies on the Prevalence and Intensity of Schistosomiasis  
457 in School Aged Children in Africa: A Systematic Review. *J Infection Drug Resistance*. 2023:2453-  
458 66.
- 459 11. Makaula P, Kayuni SA, Mamba KC, Bongololo G, Funsanani M, Musaya J, et al. An  
460 assessment of implementation and effectiveness of mass drug administration for prevention and  
461 control of schistosomiasis and soil-transmitted helminths in selected southern Malawi districts. *J*  
462 *BMC health services research*. 2022;22(1):1-18.
- 463 12. Anderson R, Truscott J, Hollingsworth TD. The coverage and frequency of mass drug  
464 administration required to eliminate persistent transmission of soil-transmitted helminths. *J*  
465 *Philosophical Transactions of the Royal Society B: Biological Sciences*.  
466 2014;369(1645):20130435.
- 467 13. Bronzan RN, Dorkenoo AM, Agbo YM, Halatoko W, Layibo Y, Adjeloh P, et al. Impact  
468 of community-based integrated mass drug administration on schistosomiasis and soil-transmitted  
469 helminth prevalence in Togo. *J PLOS Neglected Tropical Diseases*. 2018;12(8):e0006551.
- 470 14. Maddren R, Phillips A, Ower A, Landeryou T, Mengistu B, Anjulo U, et al. Soil-  
471 transmitted helminths and schistosome infections in Ethiopia: a systematic review of progress in  
472 their control over the past 20 years. *J Parasites vectors*. 2021;14(1):1-15.

- 473 15. Griswold E, Eigege A, Adelamo S, Mancha B, Kenrick N, Sambo Y, et al. Impact of three  
474 to five rounds of mass drug administration on schistosomiasis and soil-transmitted helminths in  
475 school-aged children in north-central Nigeria. *J The American Journal of Tropical Medicine*  
476 *Hygiene*. 2022;107(1):132.
- 477 16. Nath TC, Padmawati RS, Murhandarwati EH. Barriers and gaps in utilization and coverage  
478 of mass drug administration program against soil-transmitted helminth infection in Bangladesh:  
479 An implementation research. *J Journal of infection public health*. 2019;12(2):205-12.
- 480 17. Oluwole AS, Ekpo UF, Nebe OJ, Akpan NM, Jacob SM, Amazigo UV, et al. The new  
481 WHO guideline for control and elimination of human schistosomiasis: implications for the  
482 Schistosomiasis Elimination Programme in Nigeria. *J Infectious Diseases of Poverty*.  
483 2022;11(1):1-3.
- 484 18. Ekpo UF, Mafiana CF, Adeofun CO, Solarin AR, Idowu AB. Geographical information  
485 system and predictive risk maps of urinary schistosomiasis in Ogun State, Nigeria. *J BMC*  
486 *Infectious Diseases*. 2008;8(1):1-11.
- 487 19. Lincoln YS, Guba EG. But is it rigorous? Trustworthiness and authenticity in naturalistic  
488 evaluation. *J New directions for program evaluation*. 1986;1986(30):73-84.
- 489 20. Piotrowski H, Gwani N, Yashiyi J, Oluwole A, Ayuba S, Surakat M, et al. Promoting  
490 equity through inclusive learning, planning and implementing: lessons from Nigeria's mass drug  
491 administration programme for neglected tropical diseases. *J International Health*.  
492 2023;15(Supplement\_1):i63-i74.
- 493 21. Antonio-Nkondjio C, Ndo C, Njiokou F, Bigoga JD, Awono-Ambene P, Etang J, et al.  
494 Review of malaria situation in Cameroon: technical viewpoint on challenges and prospects for  
495 disease elimination. *J Parasites vectors*. 2019;12:1-23.

- 496 22. Kabatereine NB, Malecela M, Lado M, Zaramba S, Amiel O, Kolaczinski JH. How to (or  
497 not to) integrate vertical programmes for the control of major neglected tropical diseases in sub-  
498 Saharan Africa. *J PLoS neglected tropical diseases*. 2010;4(6):e755.
- 499 23. Peto TJ, Tripura R, Davoeung C, Nguon C, Nou S, Heng C, et al. Reflections on a  
500 community engagement strategy for mass antimalarial drug administration in Cambodia. *The*  
501 *American journal of tropical medicine hygiene*. 2018;98(1):100.
- 502 24. Agrawal P, Neel A, Deresse AS, Gerber S, Alonge O. Facilitators and barriers to  
503 community engagement in the Global Polio Eradication Initiative—A mixed methods study. *J*  
504 *PLOS Global Public Health*. 2023;3(4):e0001643.
- 505 25. Lemoine JF, Desormeaux AM, Monestime F, Fayette CR, Desir L, Direny AN, et al.  
506 Controlling neglected tropical diseases (NTDs) in Haiti: implementation strategies and evidence  
507 of their success. *J PLoS neglected tropical diseases*. 2016;10(10):e0004954.
- 508 26. König A, Kajeewiwa L, Thwin M, Nosten S, Tun S, Tangseefa D, et al. Community  
509 engagement for malaria elimination in contested areas of the Karen/Kayin State, Myanmar: a case  
510 study on the Malaria Elimination Task Force. *J Wellcome Open Research*. 2018;3.
- 511 27. Lorenzo PJ, Manzanilla DR, Cortel DK, Tangog E. Community perceptions of mass drug  
512 administration for soil-transmitted helminthiasis and schistosomiasis in selected schools in the  
513 Philippines. *J Infectious diseases of poverty*. 2019;8:1-10.
- 514 28. Agboraw E, Sosu F, Dean L, Siakeh A, Thomson R, Kollie K, et al. Factors influencing  
515 mass drug administration adherence and community drug distributor opportunity costs in Liberia:  
516 a mixed-methods approach. *J Parasites vectors*. 2021;14:1-11.

517 29. Kevin DG, Lawong BD, Dixon R, Woode ME, Agboraw E, Ozano K, et al. Job satisfaction  
518 among community drug distributors in the Mass Drug Administration programme in Nigeria: a  
519 cross-sectional study. *J International Health*. 2023;15(Supplement\_1):i52-i62.

520 30. Roll A, Saxena M, Orlan E, Titus A, Juvekar SK, Gwayi-Chore M-C, et al. Policy  
521 stakeholder perspectives on barriers and facilitators to launching a community-wide mass drug  
522 administration program for soil-transmitted helminths. *J Global Health Research Policy*.  
523 2022;7(1):1-14.

524
